# Supplementary material for: DoE-Based Design of a Simple but Efficient Preparation Method for a Non-Effervescent Gastro-Retentive Floating Tablet Containing Metformin HCl
Source: MDPI journal article supplement (doi:10.3390/pharmaceutics13081225), 2021-08-08
Supplement: s1 [file s1]

# Supplementary Materials: DoE-Based Design of a Simple but Efficient Preparation Method for a Non-Effervescent Gastro-Retentive Floating Tablet Containing Metformin HCl

Byungsuk Kim, Youngjoo Byun and Eun Hee Lee

**Table S1.** The full factorial design for a screening step and dissolution profiles (mean  $\pm$  SD,  $n = 12$ ), and information on similarity factors, floating lag time and floating retention time of non-EFTs.

| Run order | X variable (Factor)   |             | Y variable (Response)       |                              |                              | Sample mean ( $f_2$ ) | FLT (s) | FRT (h) |
|-----------|-----------------------|-------------|-----------------------------|------------------------------|------------------------------|-----------------------|---------|---------|
|           | (A)Cetyl alcohol (mg) | (B)HPMC (%) | (R1)Mean diss. at 60min (%) | (R2)Mean diss. at 240min (%) | (R3)Mean diss. at 480min (%) |                       |         |         |
| F1        | 50                    | 5           | 53.0 $\pm$ 3.5              | 94.4 $\pm$ 2.6               | 98.9 $\pm$ 1.6               | 29.35                 | -       | Not     |
| F2        | 50                    | 5           | 51.1 $\pm$ 3.2              | 92.5 $\pm$ 3.0               | 98.7 $\pm$ 1.0               | 30.56                 | -       | Not     |
| F3        | 250                   | 5           | 44.1 $\pm$ 0.7              | 78.5 $\pm$ 1.4               | 91.0 $\pm$ 1.3               | 41.90                 | < 3     | > 24    |
| F4        | 250                   | 5           | 43.4 $\pm$ 0.6              | 77.7 $\pm$ 1.0               | 90.4 $\pm$ 1.8               | 42.92                 | < 3     | > 24    |
| F5        | 50                    | 25          | 41.6 $\pm$ 2.9              | 74.0 $\pm$ 3.2               | 94.0 $\pm$ 2.0               | 44.67                 | < 3     | > 24    |
| F6        | 50                    | 25          | 41.0 $\pm$ 1.2              | 73.4 $\pm$ 1.8               | 93.3 $\pm$ 2.9               | 45.77                 | < 3     | > 24    |
| F7        | 250                   | 25          | 30.9 $\pm$ 0.9              | 58.1 $\pm$ 1.4               | 75.3 $\pm$ 1.7               | 69.38                 | < 3     | > 24    |
| F8        | 250                   | 25          | 31.4 $\pm$ 0.6              | 58.6 $\pm$ 1.0               | 76.0 $\pm$ 1.5               | 71.46                 | < 3     | > 24    |
| F9        | 150                   | 15          | 38.6 $\pm$ 1.0              | 74.1 $\pm$ 1.2               | 92.1 $\pm$ 1.0               | 47.26                 | < 3     | > 24    |
| F10       | 150                   | 15          | 37.4 $\pm$ 0.4              | 73.4 $\pm$ 1.4               | 92.0 $\pm$ 1.6               | 48.50                 | < 3     | > 24    |

**Table S2.** The response surface methodology for optimization step and dissolution profiles (mean  $\pm$ SD,  $n=12$ ), and information on similarity factors, floating lag time and floating retention time of non-EFTs.

| Run order | X variable (Factor)    |              | Y variable (Response)        |                               |                               | Sample mean ( $f_2$ ) | FLT (s) | FRT (h) |
|-----------|------------------------|--------------|------------------------------|-------------------------------|-------------------------------|-----------------------|---------|---------|
|           | (A) Cetyl alcohol (mg) | (B) HPMC (%) | (R1) Mean diss. at 60min (%) | (R2) Mean diss. at 240min (%) | (R3) Mean diss. at 480min (%) |                       |         |         |
| M1        | 150                    | 15           | 39.6 $\pm$ 0.4               | 73.5 $\pm$ 0.5                | 91.8 $\pm$ 0.5                | 47.36                 | < 3     | > 24    |
| M2        | 250                    | 15           | 37.1 $\pm$ 1.5               | 67.9 $\pm$ 2.2                | 86.4 $\pm$ 2.2                | 58.15                 | < 3     | > 24    |
| M3        | 150                    | 25           | 34.1 $\pm$ 0.6               | 64.8 $\pm$ 1.5                | 84.3 $\pm$ 2.1                | 69.08                 | < 3     | > 24    |
| M4        | 250                    | 25           | 30.2 $\pm$ 1.1               | 58.2 $\pm$ 2.3                | 77.1 $\pm$ 3.3                | 75.47                 | < 3     | > 24    |
| M5        | 150                    | 20           | 37.0 $\pm$ 0.6               | 69.0 $\pm$ 1.5                | 88.5 $\pm$ 2.0                | 55.41                 | < 3     | > 24    |
| M6        | 250                    | 20           | 33.1 $\pm$ 0.8               | 62.9 $\pm$ 1.2                | 83.2 $\pm$ 1.9                | 76.76                 | < 3     | > 24    |
| M7        | 200                    | 15           | 38.1 $\pm$ 1.1               | 68.9 $\pm$ 1.0                | 86.0 $\pm$ 0.8                | 56.15                 | < 3     | > 24    |
| M8        | 200                    | 25           | 32.8 $\pm$ 0.7               | 62.3 $\pm$ 1.1                | 79.4 $\pm$ 1.7                | 77.88                 | < 3     | > 24    |
| M9        | 200                    | 20           | 34.5 $\pm$ 0.7               | 64.8 $\pm$ 1.0                | 80.1 $\pm$ 1.6                | 69.32                 | < 3     | > 24    |
| M10       | 200                    | 20           | 34.1 $\pm$ 0.6               | 63.8 $\pm$ 1.1                | 79.6 $\pm$ 1.2                | 71.74                 | < 3     | > 24    |

**Table S3.** Comparison of dissolution profiles (mean  $\pm$  SD,  $n = 12$ ) for the external validation set, model prediction accuracy and bootstrap analysis.

| Code | Cetyl alcohol (mg) | HPMC (%) | Cont.             | 60 min (%)     | 240 min (%)    | 480 min (%)    | Sample mean ( $f_2$ ) | Bootstrap analysis (500) |            |                |                |
|------|--------------------|----------|-------------------|----------------|----------------|----------------|-----------------------|--------------------------|------------|----------------|----------------|
|      |                    |          |                   |                |                |                |                       | $f_2$                    | E( $f_2$ ) | PI             | Bca            |
|      |                    |          | Glucophage XR     | 29.4 $\pm$ 0.9 | 60.4 $\pm$ 1.2 | 81.6 $\pm$ 1.3 | -                     | -                        | -          | -              | -              |
| E1   | 150                | 5        | True mean         | 43.9 $\pm$ 0.7 | 82.3 $\pm$ 2.6 | 97.1 $\pm$ 1.4 | 37.68                 | 37.69                    | 37.67      | (36.88, 38.49) | (36.84, 38.44) |
|      |                    |          | Linear Pred. mean | 45.6           | 81.2           | 98.3           | 37.18                 |                          |            |                |                |
|      |                    |          | Quad. Pred. mean  | 45.6           | 81.2           | 99.9           | 36.58                 |                          |            |                |                |
| E2   | 150                | 10       | True mean         | 40.9 $\pm$ 0.6 | 77.1 $\pm$ 0.5 | 94.2 $\pm$ 0.3 | 42.98                 | 42.98                    | 42.95      | (42.29, 43.62) | (42.35, 43.67) |
|      |                    |          | Linear Pred. mean | 42.7           | 77.0           | 94.4           | 42.13                 |                          |            |                |                |
|      |                    |          | Quad. Pred. mean  | 42.7           | 77.0           | 96.0           | 41.39                 |                          |            |                |                |
| E3   | 200                | 5        | True mean         | 43.3 $\pm$ 0.4 | 79.4 $\pm$ 0.8 | 95.4 $\pm$ 0.5 | 40.09                 | 40.06                    | 40.04      | (39.47, 40.69) | (39.50, 40.74) |
|      |                    |          | Linear Pred. mean | 43.9           | 78.1           | 95.3           | 40.58                 |                          |            |                |                |
|      |                    |          | Quad. Pred. mean  | 43.9           | 78.1           | 93.0           | 41.50                 |                          |            |                |                |
| E4   | 200                | 10       | True mean         | 40.2 $\pm$ 0.2 | 73.4 $\pm$ 0.9 | 90.7 $\pm$ 1.3 | 47.68                 | 47.73                    | 47.64      | (46.79, 48.53) | (46.91, 48.75) |
|      |                    |          | Linear Pred. mean | 41.0           | 73.9           | 91.4           | 46.45                 |                          |            |                |                |
|      |                    |          | Quad. Pred. mean  | 41.0           | 73.9           | 89.1           | 47.55                 |                          |            |                |                |
| E5   | 250                | 5        | True mean         | 44.1 $\pm$ 0.6 | 77.1 $\pm$ 1.1 | 91.9 $\pm$ 0.8 | 42.40                 | 42.45                    | 42.43      | (41.69, 43.18) | (41.70, 43.19) |

|    |                 |       |                         |            |            |            |       |       |       |                   |                   |
|----|-----------------|-------|-------------------------|------------|------------|------------|-------|-------|-------|-------------------|-------------------|
| E6 | 250             | 10    | Linear<br>Pred.<br>mean | 42.2       | 75.1       | 92.4       | 44.46 |       |       |                   |                   |
|    |                 |       | Quad.<br>Pred.<br>mean  | 42.2       | 75.1       | 93.9       | 43.74 |       |       |                   |                   |
|    |                 |       | True<br>mean            | 39.6 ± 0.9 | 72.0 ± 1.1 | 87.9 ± 2.0 | 50.70 | 50.81 | 50.64 | (49.41,<br>51.73) | (49.43,<br>51.79) |
|    |                 |       | Linear<br>Pred.<br>mean | 39.3       | 70.9       | 88.5       | 51.60 |       |       |                   |                   |
|    |                 |       | Quad.<br>Pred.<br>mean  | 39.3       | 70.9       | 90.0       | 50.68 |       |       |                   |                   |
|    |                 |       | Linear model            | RMSEP      | 1.34       | 1.18       | 0.66  |       |       |                   |                   |
|    | Quadratic model | RMSEP | 1.34                    | 1.18       | 2.17       |            |       |       |       |                   |                   |

PI: The percentile confidence interval; Bca: The bias corrected and accelerated confidence interval, RMSEP: The root mean squared error of prediction.

**Table S4.** Comparison of the dissolution profiles for the optimized formulations predicted using the RSM with the experimentally obtained dissolution profiles.

| Code | Cetyl alcohol (mg) | HPMC (%) | Mean dissolution profile | 60min (%)  | 240min (%) | 480min (%) | Sample mean (f <sub>2</sub> ) |
|------|--------------------|----------|--------------------------|------------|------------|------------|-------------------------------|
| P1   | 150                | 16       | Predicted                | 39.14      | 71.99      | 89.74      | 50.04                         |
|      |                    |          | Experimentally obtained  | 39.1 ± 0.7 | 72.2 ± 0.9 | 89.7 ± 1.5 | 49.85                         |
| P2   |                    | 17       | Predicted                | 38.55      | 71.16      | 88.96      | 51.68                         |
|      |                    |          | Experimentally obtained  | 38.1 ± 0.3 | 70.7 ± 0.3 | 89.0 ± 0.9 | 52.41                         |
| P3   |                    | 18       | Predicted                | 37.96      | 70.33      | 88.18      | 53.44                         |
|      |                    |          | Experimentally obtained  | 37.2 ± 0.4 | 70.3 ± 0.4 | 88.5 ± 0.4 | 53.80                         |
| P4   |                    | 19       | Predicted                | 37.37      | 69.49      | 87.40      | 55.36                         |
|      |                    |          | Experimentally obtained  | 37.3±0.5   | 69.6±0.9   | 88.4±1.1   | 54.63                         |

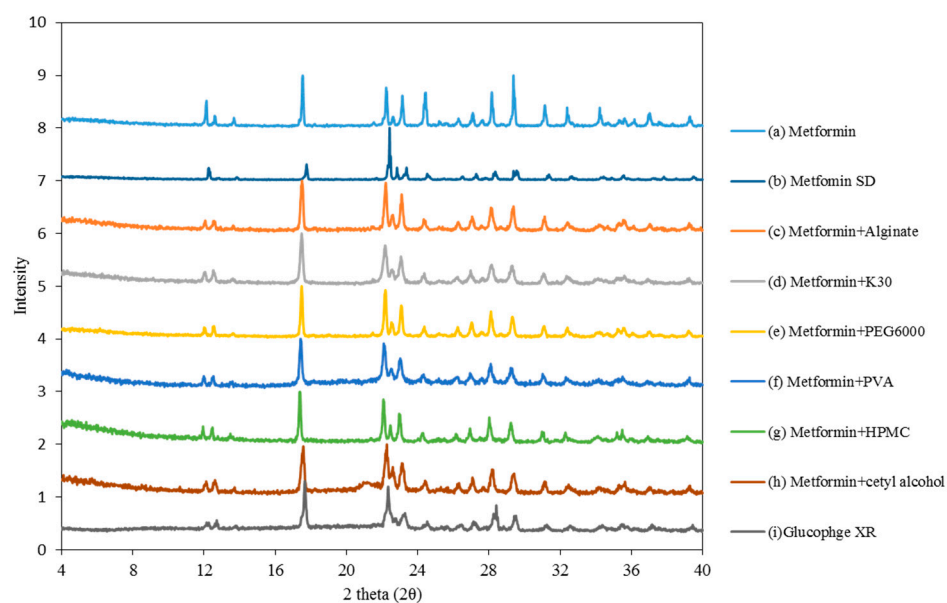

**Figure S1.** PXRD patterns for crystalline metformin HCl, co-spray dried solid dispersions, and Glucophage XR.

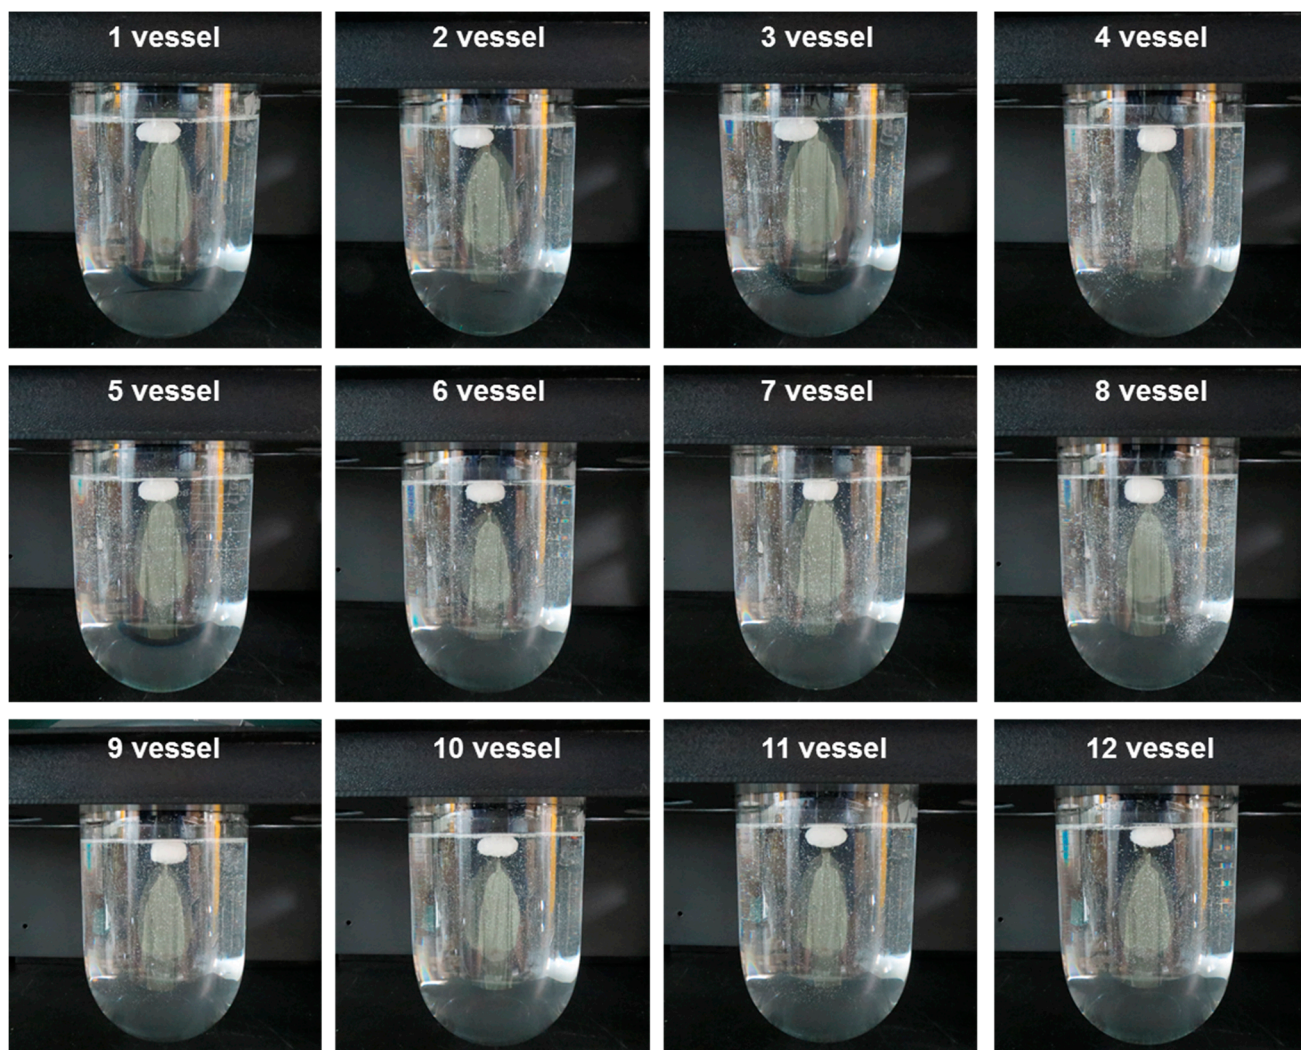

**Figure S2.** Images of non-EFTs in the vessels after the 24-h dissolution test ( $n = 12$ ).



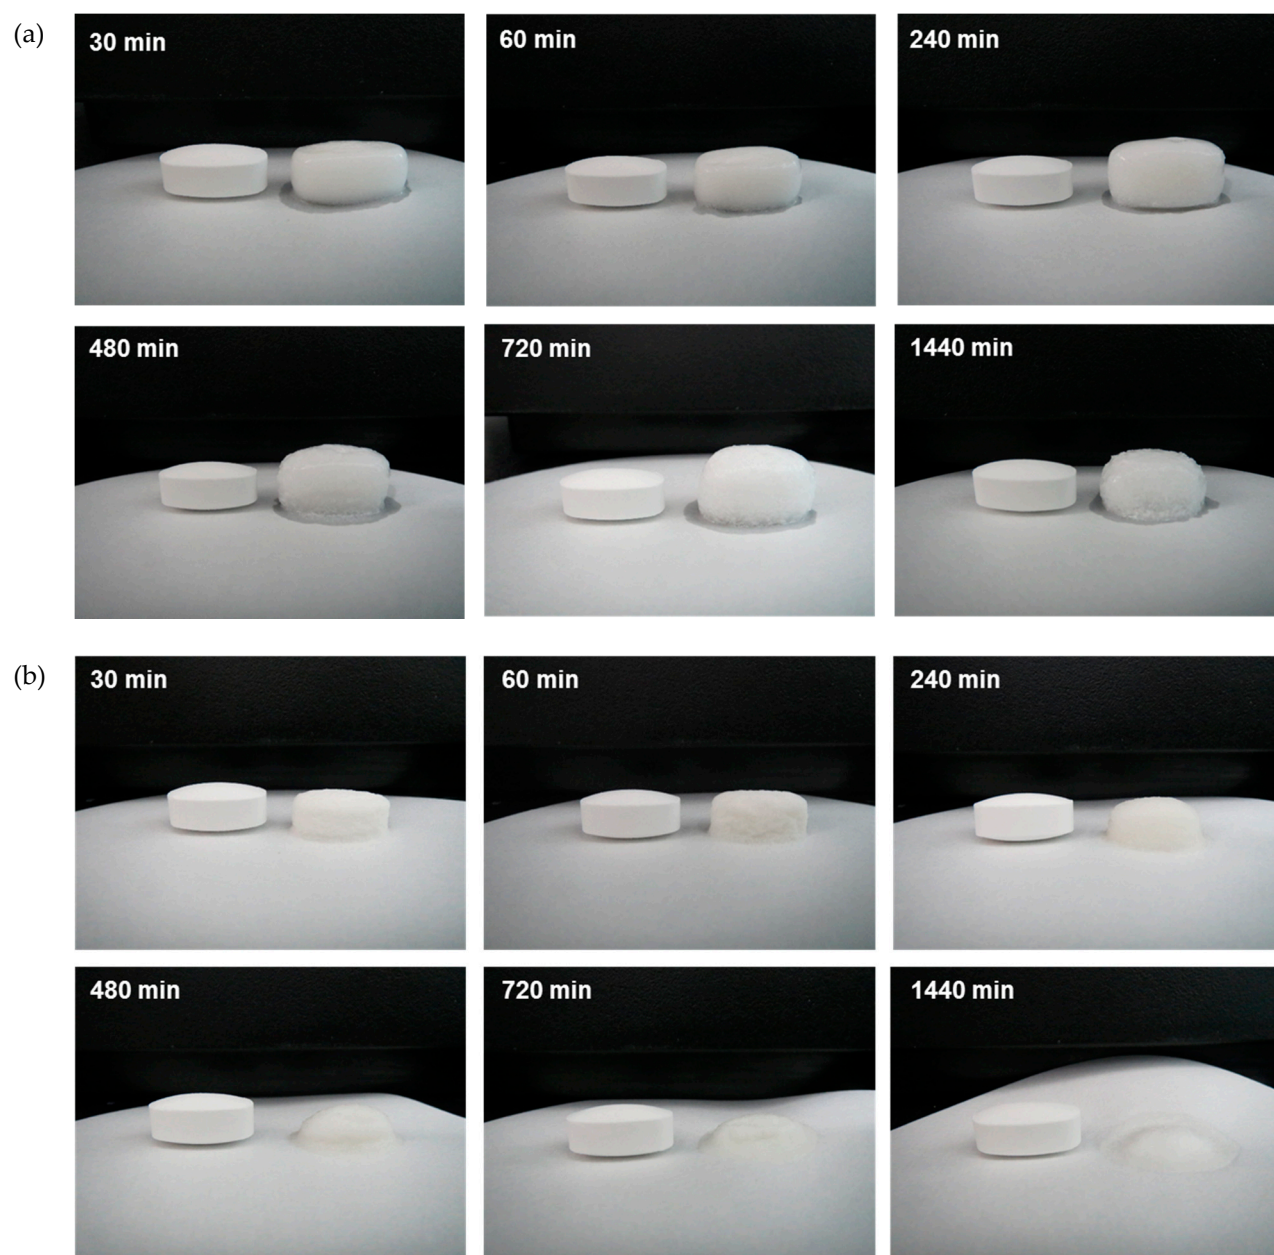

**Figure S3.** Images of non-EFTs during (a) swelling and (b) erosion tests over time. Non-EFTs were taken out from the vessels at predetermined times during the dissolution test.
